# Supplementary material
Source: PubMed Central journal article supplement (PMC8679308)
Supplement: deaa332_supplementary_tables2.pdf [file deaa332_supplementary_tables2.pdf]

**Supplementary Table SII Association of pregnancy loss and paternal metabolic syndrome (MetS) stratified by paternal age.\***

| Paternal age, years | Paternal MetS components  | Ectopic     |                  | Spontaneous abortion |                  | Stillbirth  |                  | Not live birth <sup>§</sup> |                  |
|---------------------|---------------------------|-------------|------------------|----------------------|------------------|-------------|------------------|-----------------------------|------------------|
|                     |                           | N (%)       | RR (95% CI)      | N (%)                | RR (95% CI)      | N (%)       | RR (95% CI)      | N (%)                       | RR (95% CI)      |
| <30                 | 0                         | 1775 (85.3) | Ref              | 11 957 (86.2)        | Ref              | 809 (87.7)  | Ref              | 14 541 (86.2)               | Ref              |
|                     | 1                         | 226 (10.9)  | 1.12 [0.97–1.27] | 1456 (10.5)          | 1.13 [1.07–1.18] | 87 (9.4)    | 0.96 [0.75–1.17] | 1769 (10.5)                 | 1.12 [1.06–1.17] |
|                     | 2                         | 60 (2.9)    | 1.19 [0.89–1.49] | 374 (2.7)            | 1.21 [1.10–1.32] | 20 (2.2)    | 0.90 [0.50–1.30] | 454 (2.7)                   | 1.19 [1.08–1.30] |
|                     | 3+                        | 20+ (1.0)   | 1.66 [0.96–2.36] | 82 (0.59)            | 1.13 [0.91–1.35] | <11 (0.76)  | 1.32 [0.34–2.30] | 110 (0.65)                  | 1.21 [1.01–1.45] |
|                     | <i>P</i> <sub>Trend</sub> |             | 0.27             |                      | <0.0001          |             | <0.0001          |                             | <0.0001          |
| 30–35               | 0                         | 5761 (75.2) | Ref              | 42 353 (78.9)        | Ref              | 2738 (78.1) | Ref              | 50 852 (78.4)               | Ref              |
|                     | 1                         | 1350 (17.6) | 1.29 [1.22–1.37] | 8299 (15.5)          | 1.12 [1.10–1.15] | 544 (15.5)  | 1.11 [1.01–1.22] | 10 193 (15.7)               | 1.13 [1.11–1.15] |
|                     | 2                         | 409 (5.3)   | 1.36 [1.23–1.50] | 2384 (4.4)           | 1.17 [1.12–1.22] | 176 (5.0)   | 1.27 [1.07–1.46] | 2969 (4.6)                  | 1.18 [1.14–1.22] |
|                     | 3+                        | 145 (1.9)   | 1.63 [1.37–1.90] | 665 (1.2)            | 1.18 [1.08–1.27] | 50 (1.4)    | 1.24 [0.89–1.59] | 860 (1.3)                   | 1.21 [1.13–1.29] |
|                     | <i>P</i> <sub>Trend</sub> |             | <0.0001          |                      | <0.0001          |             | <0.0001          |                             | <0.0001          |
| >35                 | 0                         | 6501 (63.1) | Ref              | 50 414 (66.1)        | Ref              | 3157 (68.1) | Ref              | 60 072 (65.8)               | Ref              |
|                     | 1                         | 2343 (22.8) | 1.21 [1.15–1.27] | 16 618 (21.8)        | 1.12 [1.10–1.14] | 931 (20.1)  | 1.00 [0.93–1.08] | 19 892 (21.8)               | 1.10 [1.08–1.11] |
|                     | 2                         | 1025 (10.0) | 1.35 [1.26–1.44] | 6753 (8.9)           | 1.18 [1.14–1.21] | 396 (8.6)   | 1.09 [0.97–1.21] | 8174 (9.0)                  | 1.14 [1.11–1.16] |
|                     | 3+                        | 427 (4.2)   | 1.58 [1.42–1.74] | 2533 (3.3)           | 1.28 [1.22–1.35] | 149 (3.2)   | 1.16 [0.96–1.35] | 3109 (3.4)                  | 1.16 [1.09–1.25] |
|                     | <i>P</i> <sub>Trend</sub> |             | <0.0001          |                      | <0.0001          |             | <0.0001          |                             | <0.0001          |

\*Adjusted for outcome year, region, maternal hypertension, diabetes mellitus, obesity, hyperlipidemia, smoking and smoking. Percentages represent row totals of all pregnancy outcomes and may not add to 100% due to rounding. Data presented as relative risk with 95% CI.

<sup>§</sup>Ectopic + spontaneous abortion + stillbirth.
