# Supplementary material
Source: PubMed Central journal article supplement (PMC8679308)
Supplement: deaa332_supplementary_tablesi.pdf [file deaa332_supplementary_tablesi.pdf]

Supplementary Table S1 Association of pregnancy loss, paternal Charlson comorbidity index (CCI) and chronic diseases.\*

|                                     | Paternal CCI |                  | Ectopic        |                  | Spontaneous abortion |                   | Stillbirth     |                  | Not live birth† |                  |
|-------------------------------------|--------------|------------------|----------------|------------------|----------------------|-------------------|----------------|------------------|-----------------|------------------|
|                                     | N (%)        | RR (95% CI)      | N (%)          | RR (95% CI)      | N (%)                | RR (95% CI)       | N (%)          | RR (95% CI)      | N (%)           | RR (95% CI)      |
| 0                                   | 16 039 (2.0) | Ref              | 117 402 (14.5) | Ref              | 7416 (0.92)          | Ref               | 140 857 (17.4) | Ref              | 140 857 (17.4)  | Ref              |
| 1                                   | 2968 (2.6)   | 1.17 [1.12–1.21] | 20 016 (17.2)  | 1.11 [1.09–1.13] | 1248 (1.1)           | 1.09 [1.03–1.16]  | 24 232 (20.8)  | 1.09 [1.08–1.11] | 24 232 (20.8)   | 1.09 [1.08–1.11] |
| 2                                   | 644 (3.1)    | 1.31 [1.20–1.41] | 4010 (19.1)    | 1.17 [1.09–1.21] | 255 (1.2)            | 1.17 [1.03–1.32]  | 4909 (23.4)    | 1.15 [1.12–1.18] | 4909 (23.4)     | 1.15 [1.12–1.18] |
| 3+                                  | 392 (3.3)    | 1.32 [1.19–1.45] | 2460 (20.8)    | 1.21 [1.16–1.27] | 145 (1.2)            | 1.12 [0.94–1.31]  | 2997 (25.3)    | 1.15 [1.11–1.19] | 2997 (25.3)     | 1.15 [1.11–1.19] |
| P <sub>Trend</sub>                  |              | <0.0001          |                | <0.0001          |                      | <0.0001           |                | <0.0001          |                 | <0.0001          |
| <b>Comorbidity</b>                  |              |                  |                |                  |                      |                   |                |                  |                 |                  |
| <b>Presence of comorbidity</b>      | N (%)        | RR (95% CI)      | N (%)          | RR (95% CI)      | N (%)                | RR (95% CI)       | N (%)          | RR (95% CI)      | N (%)           | RR (95% CI)      |
| <b>Hypertension</b>                 |              |                  |                |                  |                      |                   |                |                  |                 |                  |
| No                                  | 16 862 (2.0) | Ref              | 123 952 (14.6) | Ref              | 7850 (0.92)          | Ref               | 148 664 (17.5) | Ref              | 148 664 (17.5)  | Ref              |
| Yes                                 | 3181 (2.9)   | 1.23 [1.18–1.27] | 19 936 (18.3)  | 1.10 [1.08–1.12] | 1214 (1.1)           | 1.04 [0.98–1.11]  | 24 331 (22.3)  | 1.09 [1.08–1.11] | 24 331 (22.3)   | 1.09 [1.08–1.11] |
| <b>Diabetes mellitus</b>            |              |                  |                |                  |                      |                   |                |                  |                 |                  |
| No                                  | 18 984 (2.1) | Ref              | 137 765 (14.9) | Ref              | 8680 (0.94)          | Ref               | 165 429 (17.9) | Ref              | 165 429 (17.9)  | Ref              |
| Yes                                 | 1059 (3.3)   | 1.30 [1.23–1.38] | 6123 (19.2)    | 1.10 [1.07–1.13] | 384 (1.2)            | 1.07 [0.96–1.18]  | 7566 (23.7)    | 1.08 [1.04–1.13] | 7566 (23.7)     | 1.08 [1.04–1.13] |
| <b>Obesity</b>                      |              |                  |                |                  |                      |                   |                |                  |                 |                  |
| No                                  | 18 692 (2.0) | Ref              | 136 050 (14.9) | Ref              | 8542 (0.93)          | Ref               | 163 284 (17.8) | Ref              | 163 284 (17.8)  | Ref              |
| Yes                                 | 1351 (3.2)   | 1.29 [1.22–1.36] | 7838 (18.4)    | 1.12 [1.09–1.14] | 522 (1.2)            | 1.14 [1.03–1.24]  | 9711 (22.8)    | 1.10 [1.06–1.14] | 9711 (22.8)     | 1.10 [1.06–1.14] |
| <b>Hyperlipidemia</b>               |              |                  |                |                  |                      |                   |                |                  |                 |                  |
| No                                  | 16 859 (2.0) | Ref              | 122 035 (14.5) | Ref              | 7794 (0.93)          | Ref               | 146 688 (17.5) | Ref              | 146 688 (17.5)  | Ref              |
| Yes                                 | 3184 (2.7)   | 1.15 [1.10–1.19] | 21 853 (18.5)  | 1.12 [1.10–1.13] | 1270 (1.1)           | 1.03 [0.96–1.09]  | 26 307 (22.3)  | 1.09 [1.08–1.11] | 26 307 (22.3)   | 1.09 [1.08–1.11] |
| <b>COPD</b>                         |              |                  |                |                  |                      |                   |                |                  |                 |                  |
| No                                  | 18 043 (2.1) | Ref              | 130 480 (14.8) | Ref              | 8183 (0.93)          | Ref               | 156 706 (17.8) | Ref              | 156 706 (17.8)  | Ref              |
| Yes                                 | 2000 (2.5)   | 1.13 [1.08–1.18] | 13 408 (17.0)  | 1.09 [1.07–1.11] | 881 (1.1)            | 1.14 [1.06–1.22]  | 16 289 (20.7)  | 1.08 [1.06–1.10] | 16 289 (20.7)   | 1.08 [1.06–1.10] |
| <b>Cancer</b>                       |              |                  |                |                  |                      |                   |                |                  |                 |                  |
| No                                  | 19 803 (2.1) | Ref              | 142 210 (15.0) | Ref              | 8961 (0.94)          | Ref               | 170 974 (18.0) | Ref              | 170 974 (18.0)  | Ref              |
| Yes                                 | 240 (2.5)    | 1.08 [0.95–1.21] | 1678 (17.7)    | 1.06 [1.01–1.11] | 103 (1.1)            | 1.06 [0.85–1.26]  | 2021 (21.3)    | 1.05 [1.01–1.10] | 2021 (21.3)     | 1.05 [1.01–1.10] |
| <b>Depression</b>                   |              |                  |                |                  |                      |                   |                |                  |                 |                  |
| No                                  | 18 787 (2.1) | Ref              | 135 857 (14.9) | Ref              | 8596 (0.94)          | Ref               | 163 240 (17.8) | Ref              | 163 240 (17.8)  | Ref              |
| Yes                                 | 1256 (2.9)   | 1.19 [1.12–1.26] | 8031 (18.3)    | 1.11 [1.08–1.14] | 468 (1.1)            | 1.04 [0.94–1.14]  | 9755 (22.2)    | 1.10 [1.08–1.12] | 9755 (22.2)     | 1.10 [1.08–1.12] |
| <b>Heart disease</b>                |              |                  |                |                  |                      |                   |                |                  |                 |                  |
| No                                  | 18 662 (2.1) | Ref              | 135 051 (14.8) | Ref              | 8525 (0.94)          | Ref               | 162 238 (17.8) | Ref              | 162 238 (17.8)  | Ref              |
| Yes                                 | 1381 (2.9)   | 1.21 [1.15–1.27] | 8837 (18.5)    | 1.11 [1.09–1.14] | 539 (1.1)            | 1.08 [0.989–1.18] | 10 757 (22.5)  | 1.09 [1.05–1.12] | 10 757 (22.5)   | 1.09 [1.05–1.12] |
| <b>Chronic diseases<sup>§</sup></b> |              |                  |                |                  |                      |                   |                |                  |                 |                  |
| 0                                   | 11 827 (1.8) | Ref              | 88 984 (13.8)  | Ref              | 5718 (0.89)          | Ref               | 106 529 (16.6) | Ref              | 106 529 (16.6)  | Ref              |
| 1                                   | 4783 (2.4)   | 1.17 [1.13–1.21] | 33 283 (16.4)  | 1.10 [1.08–1.12] | 2011 (0.99)          | 1.04 [0.988–1.10] | 40 077 (19.8)  | 1.10 [1.08–1.11] | 40 077 (19.8)   | 1.10 [1.08–1.11] |
| 2                                   | 2073 (2.8)   | 1.26 [1.21–1.32] | 13 713 (18.3)  | 1.15 [1.13–1.18] | 858 (1.2)            | 1.12 [1.04–1.21]  | 16 644 (22.3)  | 1.15 [1.13–1.16] | 16 644 (22.3)   | 1.15 [1.13–1.16] |
| 3                                   | 892 (3.3)    | 1.40 [1.30–1.49] | 5450 (20.2)    | 1.21 [1.17–1.25] | 308 (1.1)            | 1.05 [0.93–1.17]  | 6650 (24.6)    | 1.20 [1.17–1.22] | 6650 (24.6)     | 1.20 [1.17–1.22] |
| 4+                                  | 468 (4.2)    | 1.57 [1.43–1.71] | 2458 (21.9)    | 1.23 [1.17–1.28] | 169 (1.5)            | 1.27 [1.07–1.47]  | 3095 (27.6)    | 1.18 [1.11–1.26] | 3095 (27.6)     | 1.18 [1.11–1.26] |
| P <sub>Trend</sub>                  |              | <0.0001          |                | <0.0001          |                      | <0.0001           |                | <0.0001          |                 | <0.0001          |

\*Adjusted for outcome year, region, maternal hypertension, diabetes mellitus, obesity, hyperlipidemia, age, smoking, components of all chronic diseases, paternal age and smoking. Chronic diseases included hypertension, diabetes mellitus, obesity, hyperlipidemia, COPD, cancer and depression. Percentages represent row totals of all pregnancy outcomes and may not add to 100% due to rounding.

§Chronic diseases are sums of the listed comorbidities within the table.

†Ectopic + spontaneous abortion + stillbirth.

RR, relative risk; COPD, chronic obstructive pulmonary disease.
