# Supplementary material
Source: PubMed Central journal article supplement (PMC8679308)
Supplement: deaa332_supplementary_tablesiii.pdf [file deaa332_supplementary_tablesiii.pdf]

human reproduction **SUPPLEMENTARY DATA**

**Supplementary Table SIII Association of pregnancy loss and paternal metabolic syndrome (MetS) examining only a single-pregnancy outcome per couple.\***

| Paternal MetS components  | Ectopic      |                  | Spontaneous abortion |                  | Stillbirth  |                   | Not live birth <sup>§</sup> |                  |
|---------------------------|--------------|------------------|----------------------|------------------|-------------|-------------------|-----------------------------|------------------|
|                           | N (%)        | RR (95% CI)      | N (%)                | RR (95% CI)      | N (%)       | RR (95% CI)       | N (%)                       | RR (95% CI)      |
| 0                         | 10 087 (1.7) | Ref              | 75 478 (12.5)        | Ref              | 5045 (0.84) | Ref               | 90 610 (15.0)               | Ref              |
| 1                         | 2644 (2.3)   | 1.19 [1.14–1.24] | 18 130 (15.4)        | 1.12 [1.10–1.14] | 1140 (0.97) | 1.05 [0.98–1.12]  | 21 914 (18.6)               | 1.11 [1.09–1.12] |
| 2                         | 1027 (2.7)   | 1.32 [1.23–1.41] | 6599 (17.4)          | 1.19 [1.16–1.23] | 421 (1.1)   | 1.12 [1.004–1.23] | 8047 (21.2)                 | 1.17 [1.14–1.19] |
| 3+                        | 387 (3.4)    | 1.49 [1.34–1.65] | 2221 (19.5)          | 1.26 [1.20–1.32] | 143 (1.3)   | 1.14 [0.95–1.34]  | 2751 (24.1)                 | 1.19 [1.12–1.25] |
| <i>P</i> <sub>Trend</sub> |              | <0.0001          |                      | <0.0001          |             | <0.0001           |                             | <0.0001          |

\*Adjusted for outcome year, region, maternal hypertension, diabetes mellitus, obesity, hyperlipidemia, smoking and smoking. Percentages represent row totals of all pregnancy outcomes and may not add to 100% due to rounding. Data presented as relative risk with 95% CI.

<sup>§</sup>Ectopic + spontaneous abortion + stillbirth.
